# Supplementary material
Source: PubMed Central journal article supplement (PMC4477332)
Supplement: supp_dc14-3053v143053_DC143053SupplementaryData.pdf [file supp_dc14-3053v143053_DC143053SupplementaryData.pdf]

## SUPPLEMENTARY DATA

### Supplementary Table 1. Eligibility and Exclusion Criteria

#### Eligibility Criteria

- 1) Clinical diagnosis of type 1 diabetes and using daily insulin therapy for at least one year and an insulin infusion pump for at least 6 months  
*The diagnosis of type 1 diabetes is based on the investigator's judgment; C peptide level and antibody determinations were not required.*
- 2) Age 3 to 14 years
- 3) Glycated hemoglobin level  $\leq 8.5\%$  (69 mmol/mol)
  - Measured with DCA2000 or equivalent device for assessing eligibility
  - Based on an analysis of the JDRF CGM RCT dataset<sup>20</sup>, participants higher than 8.5% (69 mmol/mol) are not expected to meet the minimum amount of nocturnal hypoglycemia (at least one night with a CGM glucose value  $\leq 60$  mg/dL or at least three different nights with a sensor glucose value  $\leq 70$  mg/dL).
  - Glycated hemoglobin measurements performed as part of usual clinical care within 2 weeks prior to obtaining informed consent for participation in the trial may be used.
- 4) Availability of internet access for periodic upload of study data

#### Exclusion Criteria

- 1) Diabetic ketoacidosis in the past 3 months
- 2) Hypoglycemic seizure or loss of consciousness in the past 6 months
- 3) History of seizure disorder (except for hypoglycemic seizure)
- 4) History of any heart disease including coronary artery disease, heart failure, or arrhythmias
- 5) Cystic fibrosis
- 6) Current use of oral/inhaled glucocorticoids, beta-blockers or other medications, which in the judgment of the investigator would be a contraindication to participation in the study.
- 7) History of ongoing renal disease (other than microalbuminuria). Creatinine level to have been obtained within the last year if participant has diabetes of  $>10$  years duration. If creatinine is  $> 1.5$  mg/dL (0.08 mmol/L), the participant is excluded.
- 8) Medical or psychiatric condition that in the judgment of the investigator might interfere with the completion of the protocol such as:
  - Inpatient psychiatric treatment in the past 6 months
  - Uncontrolled adrenal disorder
  - Abuse of alcohol
- 9) Pregnancy  
*If female and sexually active, must agree to use a form of contraception to prevent pregnancy while a participant in the study. A negative serum pregnancy test will be required for all premenopausal women who are not surgically sterile. Participants who become pregnant will be discontinued from the study.*
- 10) Liver disease as defined by an ALT greater than 3 times the upper limit of normal

SUPPLEMENTARY DATA

**Supplementary Table 2. Participant Characteristics at Enrollment – medians (IQR) or n (%)**

| Characteristic                | Participants 11-14<br>Years of Age (N=45) | Participants 4-10<br>Years of Age (N=37) |
|-------------------------------|-------------------------------------------|------------------------------------------|
| Age (yrs)                     | 13 (11, 13)                               | 8 (6, 9)                                 |
| <i>Range</i>                  | 11 to 14                                  | 4 to 10                                  |
| Male                          | 25 (56%)                                  | 17 (46%)                                 |
| Race                          |                                           |                                          |
| White non-Hispanic            | 43 (96%)                                  | 35 (95%)                                 |
| Hispanic                      | 1 (2%)                                    | 2 (5%)                                   |
| Asian                         | 1 (2%)                                    | 0                                        |
| Diabetes duration (yr)        | 6 (3, 9)                                  | 3 (2, 5)                                 |
| Body-mass index percentile *  | 69 (44, 82)                               | 69 (51, 82)                              |
| HbA1c (%)                     | 7.7 (7.3, 8.2)                            | 7.8 (7.5, 8.0)                           |
| HbA1c (mmol/mol)              | 61 (56, 66)                               | 62 (58, 64)                              |
| Daily insulin dose (U/kg/day) | 0.83 (0.72, 0.96)                         | 0.76 (0.69, 0.86)                        |

\* Body-mass index percentiles adjusted for age and gender were computed using the 2000 CDC population growth chart data (Kuczmarski RJ, Ogden CL, Grummer-Strawn LM, et al. CDC growth charts: United States. *Adv Data* 2000:1-27).

SUPPLEMENTARY DATA

Supplementary Figure 3A. Among Participants 11-14 Years of Age, Study Flowchart

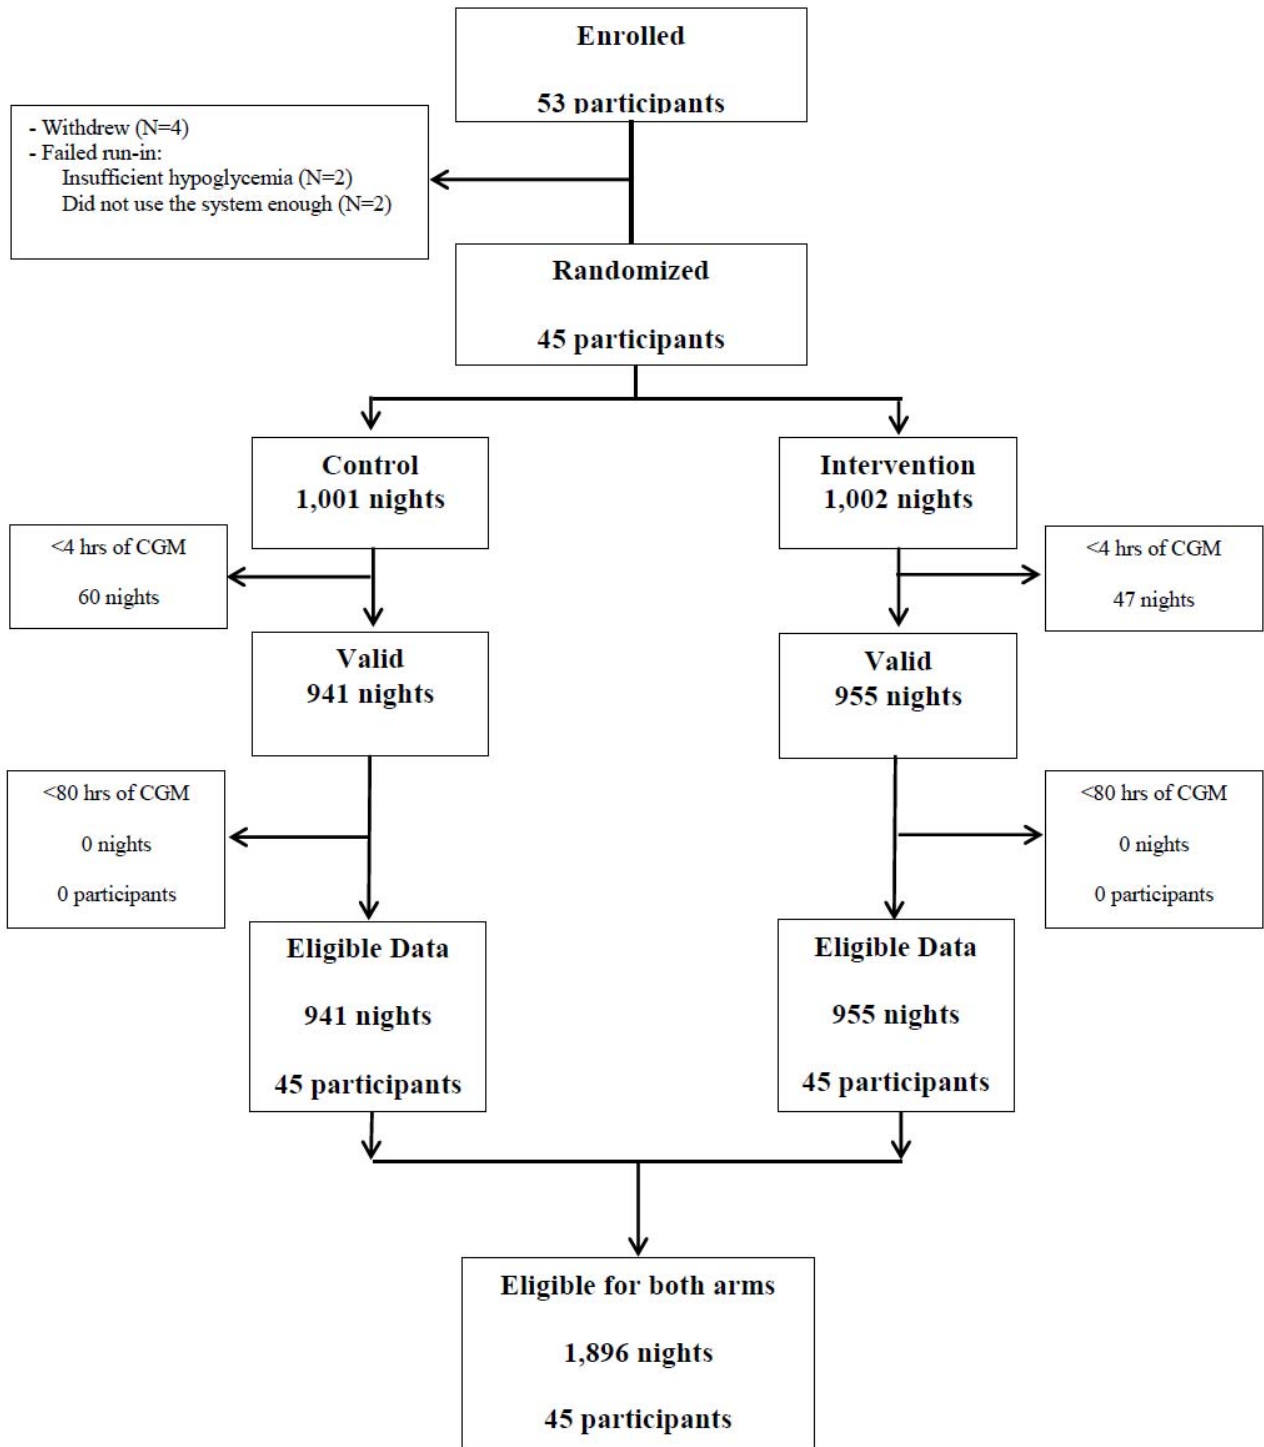

SUPPLEMENTARY DATA

Supplementary Figure 3B. Among Participants 4-10 Years of Age, Study Flowchart

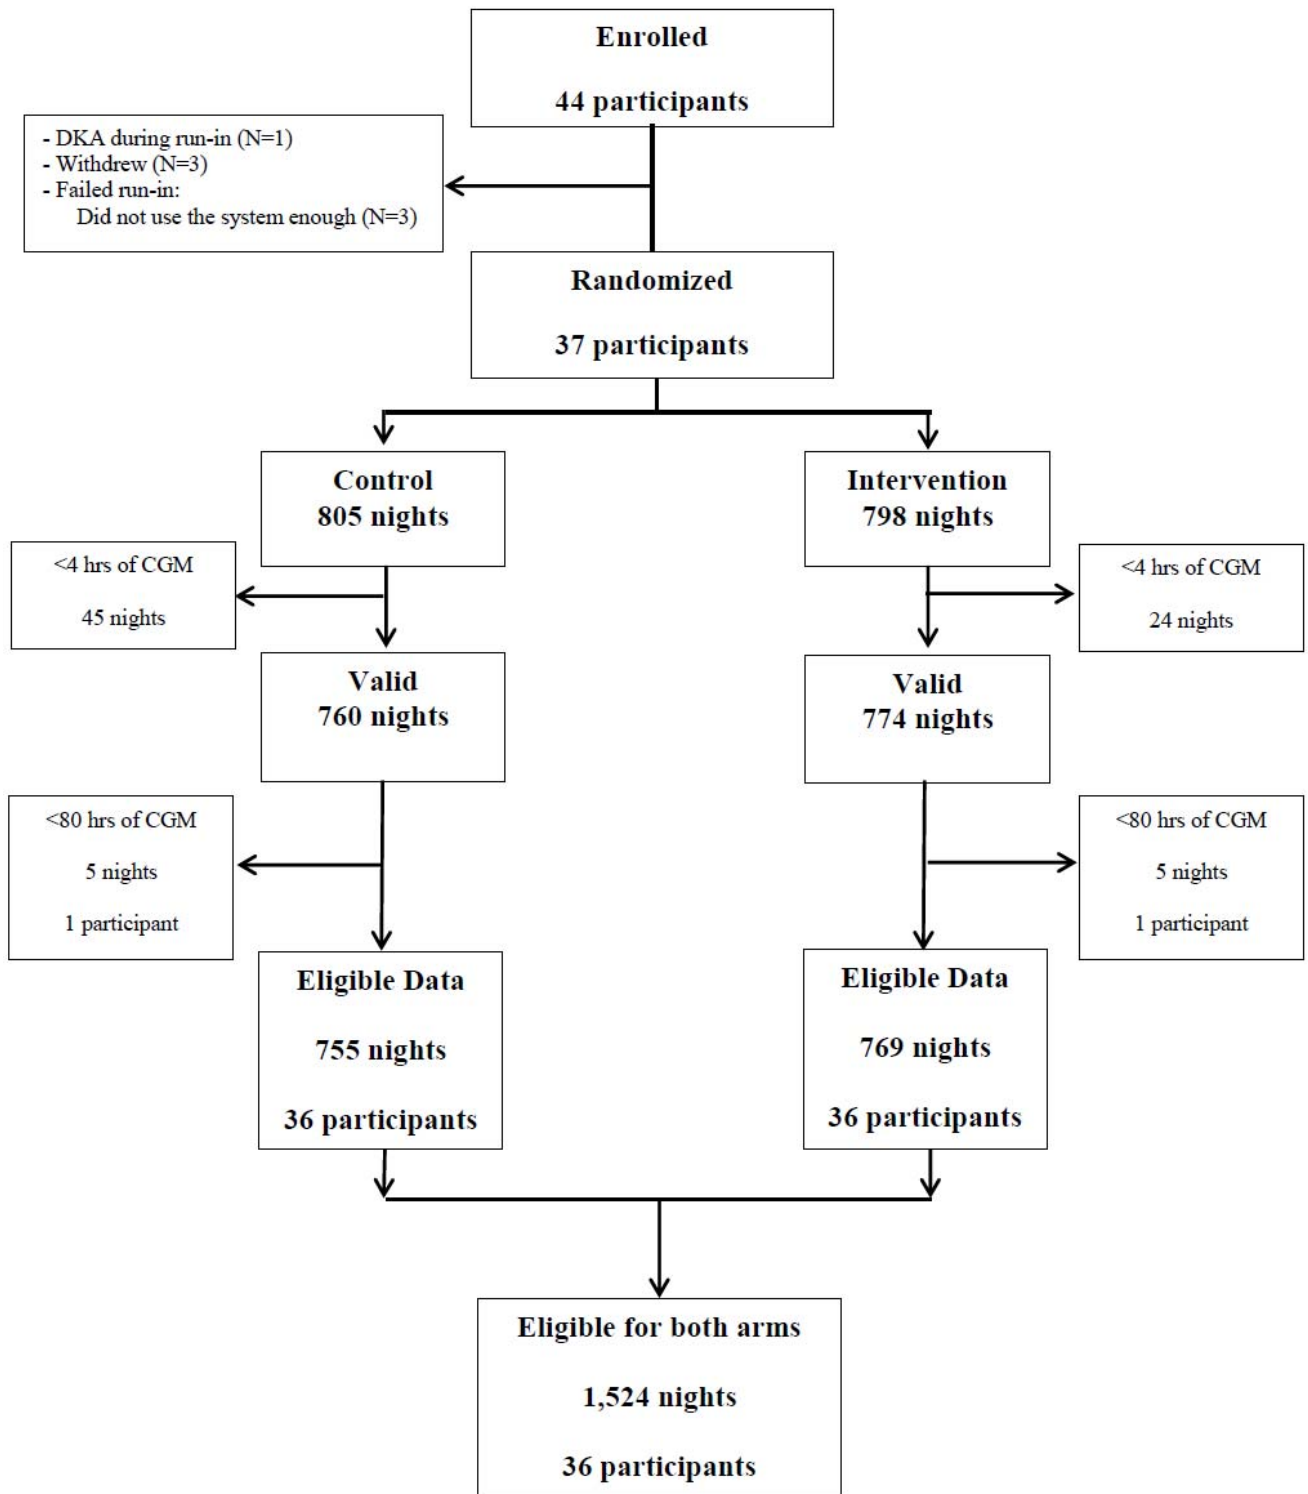

SUPPLEMENTARY DATA

**Supplementary Table 4. Number of Nights Required to Complete 42 Nights**

|                                                        | <b>Participants 11-14<br/>Years of Age</b> | <b>Participants 4-10<br/>Years of Age</b> |
|--------------------------------------------------------|--------------------------------------------|-------------------------------------------|
| # participants enrolled                                | 45                                         | 37                                        |
| # participants with at least 80hr of CGM in each arm   | 45 (100%)                                  | 36 (97%)                                  |
| # participants completing 42 nights.                   | 44 (98%)                                   | 34 (92%)                                  |
| # nights to complete study                             |                                            |                                           |
| Median ( <i>IQR</i> )                                  | 59 (52, 69)                                | 63 (54, 71)                               |
| 42-47 nights                                           | 2 (5%)                                     | 1 (3%)                                    |
| 48-53 nights                                           | 11 (25%)                                   | 6 (18%)                                   |
| 54-59 nights                                           | 9 (20%)                                    | 7 (21%)                                   |
| 60-65 nights                                           | 6 (14%)                                    | 6 (18%)                                   |
| 66-70 nights                                           | 6 (14%)                                    | 5 (15%)                                   |
| ≥71 nights                                             | 10 (23%)                                   | 9 (26%)                                   |
| # nights skipped <i>median (IQR)</i>                   | 15 (9, 25)                                 | 18 (11, 25)                               |
| # nights with <4 hours of CGM data <i>median (IQR)</i> | 1 (1, 3)                                   | 1 (0, 2)                                  |

SUPPLEMENTARY DATA

**Supplementary Table 5. Additional Efficacy and Safety Secondary Outcomes\***

|                                                                       | Participants 11-14 Years of Age (N=45) |                     |         | Participants 4-10 Years of Age (N=36†) |                     |         |
|-----------------------------------------------------------------------|----------------------------------------|---------------------|---------|----------------------------------------|---------------------|---------|
|                                                                       | Control Nights                         | Intervention Nights | P-value | Control Nights                         | Intervention Nights | P-value |
|                                                                       | 941                                    | 955                 |         | 755                                    | 769                 |         |
| <b>Hypoglycemia Outcomes</b>                                          |                                        |                     |         |                                        |                     |         |
| % of nights with glucose level <70 mg/dL for a cumulative duration of |                                        |                     |         |                                        |                     |         |
| > 30min                                                               | 31%                                    | 23%                 | <0.001  | 26%                                    | 18%                 | <0.001  |
| > 60min                                                               | 26%                                    | 17%                 | <0.001  | 19%                                    | 12%                 | <0.001  |
| > 120min                                                              | 18%                                    | 9%                  | <0.001  | 12%                                    | 6%                  | <0.001  |
| > 180min                                                              | 13%                                    | 5%                  | <0.001  | 6%                                     | 3%                  | 0.002   |
| % of nights with glucose level <60 mg/dL for a cumulative duration of |                                        |                     |         |                                        |                     |         |
| > 30min                                                               | 21%                                    | 14%                 | <0.001  | 16%                                    | 10%                 | <0.001  |
| > 60min                                                               | 15%                                    | 9%                  | <0.001  | 10%                                    | 6%                  | 0.005   |
| > 120min                                                              | 11%                                    | 4%                  | <0.001  | 6%                                     | 3%                  | 0.002   |
| > 180min                                                              | 7%                                     | 2%                  | <0.001  | 3%                                     | 1%                  | 0.002   |
| % of nights with events of glucose <70 mg/dL continuously‡ for        |                                        |                     |         |                                        |                     |         |
| > 10min                                                               | 36%                                    | 31%                 | 0.006   | 32%                                    | 25%                 | 0.001   |
| > 25min                                                               | 32%                                    | 23%                 | <0.001  | 25%                                    | 18%                 | <0.001  |
| > 60min                                                               | 23%                                    | 14%                 | <0.001  | 15%                                    | 10%                 | 0.003   |
| > 120min                                                              | 14%                                    | 7%                  | <0.001  | 8%                                     | 4%                  | <0.001  |

\*Glucose results from CGM unless specified as blood glucose.

†One participant with 5 intervention nights and 5 control nights was excluded for <80 hours of CGM glucose data.

‡Hypoglycemia event assessment based on continuous CGM values below threshold was added to statistical analysis plan post hoc

SUPPLEMENTARY DATA

**Supplementary Figure 6. Mean Glucose hours before and 2 hours after Occurrences of CGM Glucose <70 mg/dL.**

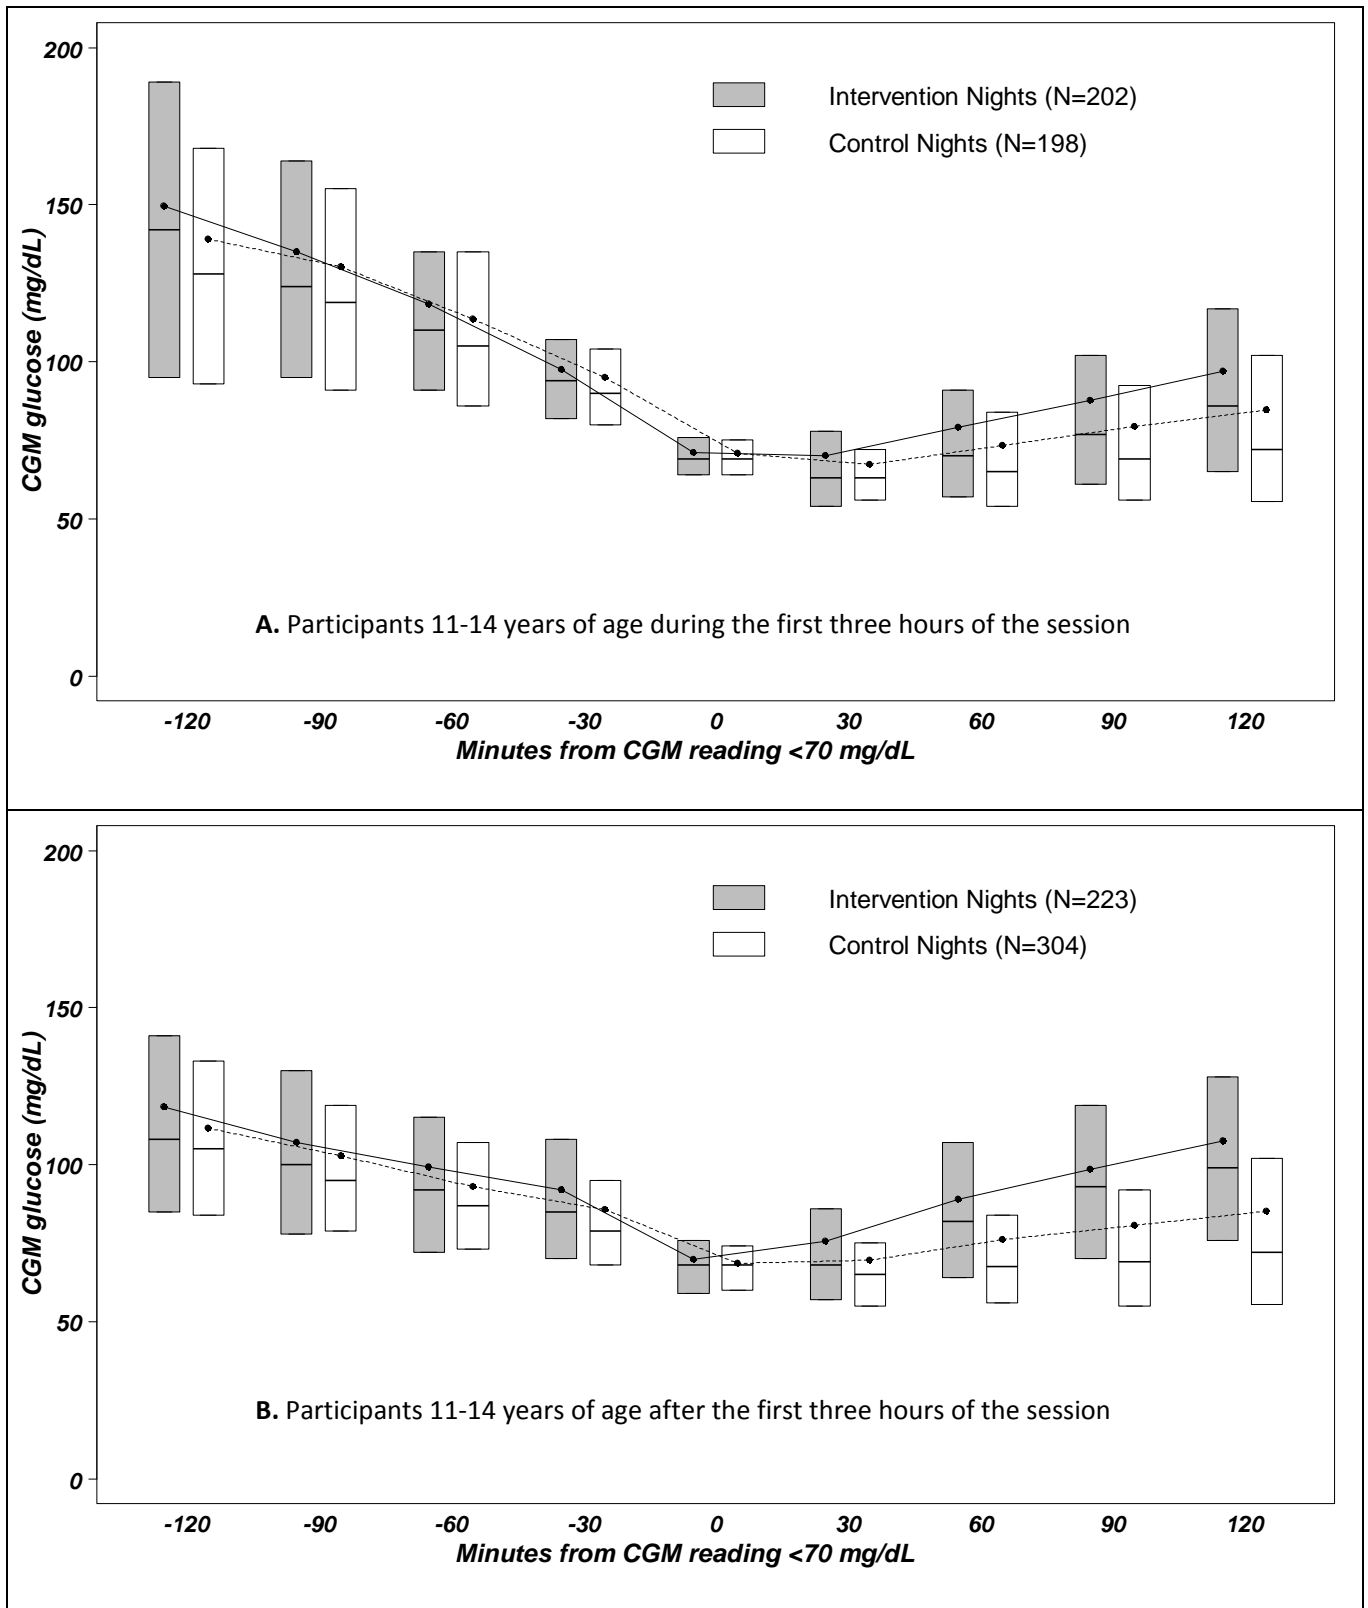

SUPPLEMENTARY DATA

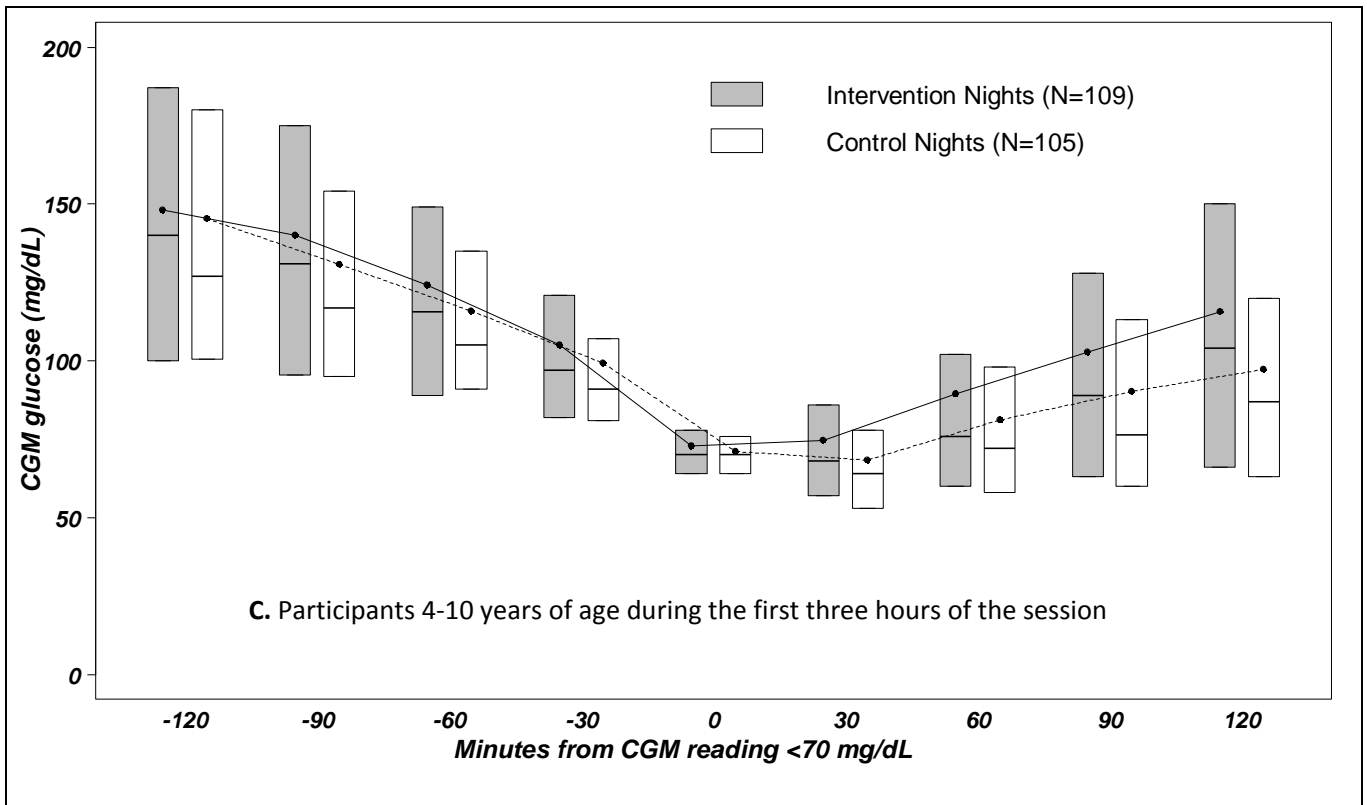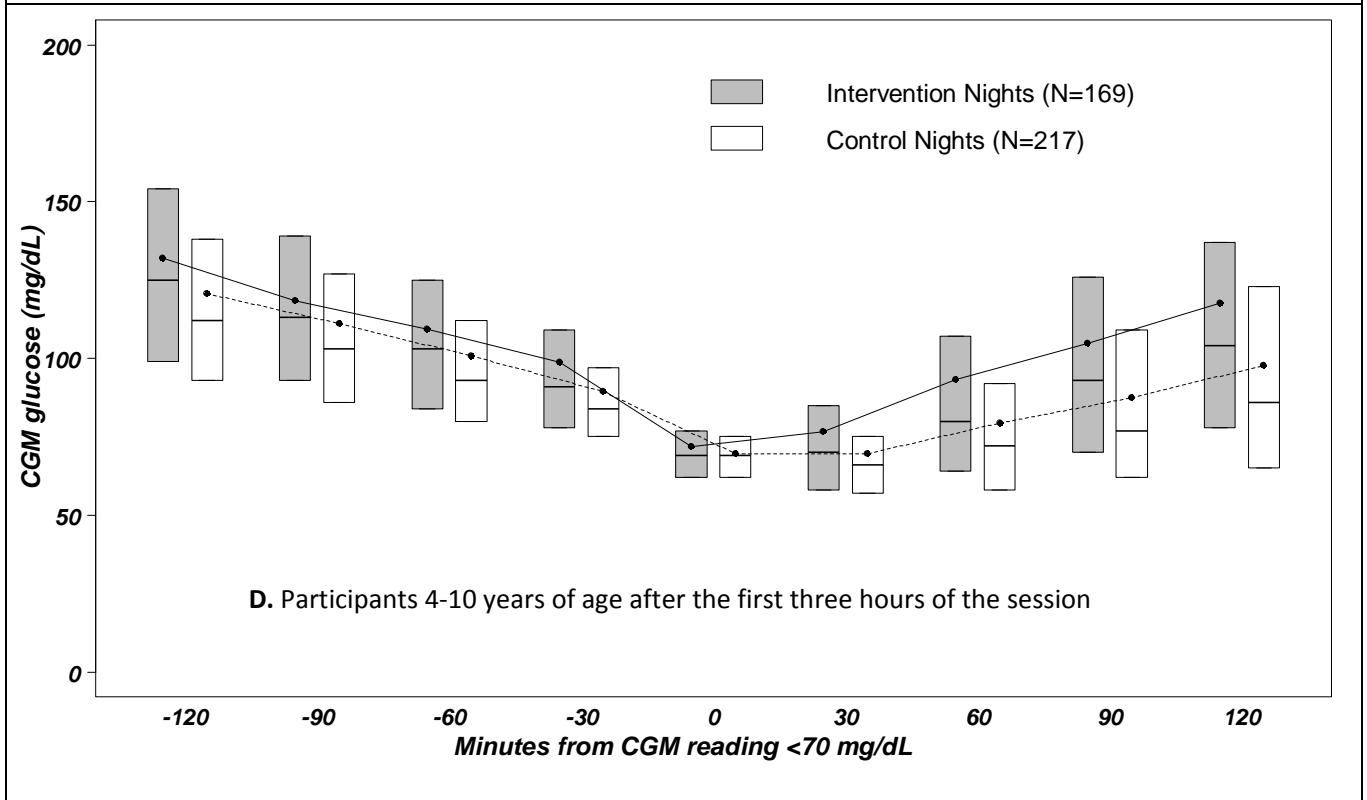



SUPPLEMENTARY DATA

**Supplementary Table 7. Application of Algorithm to Control Nights\***

|                                                                                                                                 | Age Group            |           |           |
|---------------------------------------------------------------------------------------------------------------------------------|----------------------|-----------|-----------|
|                                                                                                                                 | All                  | 11-14     | 4-10      |
| # Control Nights overall                                                                                                        | 1,696                | 941       | 755       |
| # w/ prediction of CGM glucose <80 mg/dL                                                                                        | 1,148                | 647       | 501       |
| <i>On nights when predicted, did CGM glucose actually drop to &lt;80 mg/dL within 2 hours?</i>                                  |                      |           |           |
|                                                                                                                                 | <i>No</i> 548 (48%)  | 294 (45%) | 254 (51%) |
|                                                                                                                                 | <i>Yes</i> 600 (52%) | 353 (55%) | 247 (49%) |
| <i>On nights when CGM glucose dropped to &lt;80 mg/dL, time from pump suspension recommendation to CGM glucose &lt;80 mg/dL</i> |                      |           |           |
| A) within 30 min                                                                                                                | 306 (51%)            | 179 (51%) | 127 (51%) |
| B) 30-<60 min                                                                                                                   | 168 (28%)            | 100 (28%) | 68 (28%)  |
| C) 60-<120 min                                                                                                                  | 126 (21%)            | 74 (21%)  | 52 (21%)  |

\* The first 15 minutes of the night were ignored because it was possible for the sensor glucose to start out <80 mg/dL.

SUPPLEMENTARY DATA

**Supplementary Table 8. Assessment of Sensor Accuracy**

|                                       |              | Age Group                        |                                       |                                  |                                       |
|---------------------------------------|--------------|----------------------------------|---------------------------------------|----------------------------------|---------------------------------------|
|                                       |              | 11-14 Years of Age               |                                       | 4-10 Years of Age                |                                       |
|                                       |              | <i>Control</i><br><i>N=2,193</i> | <i>Intervention</i><br><i>N=2,143</i> | <i>Control</i><br><i>N=2,173</i> | <i>Intervention</i><br><i>N=2,129</i> |
| <b>Sensor minus Reference Glucose</b> | Mean ± SD    | -20.8 ± 40.2                     | -20.4 ± 42.7                          | -19.2 ± 37.3                     | -18.4 ± 39.8                          |
|                                       | Median (IQR) | -15.0 (-36.0, 1.0)               | -15.0 (-38.0, 3.0)                    | -15.0 (-37.0, 3.0)               | -13.0 (-36.0, 4.0)                    |
| <i>Reference Meter Glucose</i>        |              |                                  |                                       |                                  |                                       |
| ≤70 mg/dL                             | N            | 81                               | 54                                    | 117                              | 45                                    |
|                                       | Mean ± SD    | -0.5 ± 18.7                      | +0.2 ± 18.7                           | +2.4 ± 23.2                      | +14.8 ± 35.8                          |
|                                       | Median (IQR) | -3.0 (-11.0, 7.0)                | -2.0 (-15.0, 10.0)                    | 1.0 (-10.0, 11.0)                | 8.0 (-5.0, 18.0)                      |
| 71-120 mg/dL                          | N            | 578                              | 467                                   | 578                              | 489                                   |
|                                       | Mean ± SD    | -12.1 ± 21.5                     | -4.3 ± 28.2                           | -7.1 ± 23.4                      | -3.7 ± 22.4                           |
|                                       | Median (IQR) | -12.0 (-24.0, 1.0)               | -6.0 (-23.0, 9.0)                     | -6.0 (-21.0, 6.0)                | -3.0 (-17.0, 8.0)                     |
| 121-180 mg/dL                         | N            | 756                              | 768                                   | 653                              | 722                                   |
|                                       | Mean ± SD    | -15.2 ± 30.0                     | -15.6 ± 31.9                          | -15.7 ± 31.7                     | -13.8 ± 32.8                          |
|                                       | Median (IQR) | -13.0 (-32.0, 3.0)               | -13.0 (-34.0, 2.0)                    | -14.0 (-34.0, 2.0)               | -11.0 (-30.0, 4.0)                    |
| >180 mg/dL                            | N            | 778                              | 854                                   | 825                              | 873                                   |
|                                       | Mean ± SD    | -35.0 ± 54.5                     | -34.9 ± 53.0                          | -33.5 ± 45.1                     | -32.2 ± 47.4                          |
|                                       | Median (IQR) | -26.0 (-56.0, -4.0)              | -28.0 (-60.0, -1.0)                   | -30.0 (-57.0, -7.0)              | -28.0 (-56.0, -4.0)                   |

SUPPLEMENTARY DATA

|                                                  | Age Group    |                                  |                                       |                                  |                                       |
|--------------------------------------------------|--------------|----------------------------------|---------------------------------------|----------------------------------|---------------------------------------|
|                                                  |              | 11-14 Years of Age               |                                       | 4-10 Years of Age                |                                       |
|                                                  |              | <i>Control</i><br><i>N=2,193</i> | <i>Intervention</i><br><i>N=2,143</i> | <i>Control</i><br><i>N=2,173</i> | <i>Intervention</i><br><i>N=2,129</i> |
| <b>Relative Absolute Difference</b> <sup>†</sup> | Mean ± SD    | 18% ± 16%                        | 19% ± 17%                             | 18% ± 17%                        | 18% ± 19%                             |
|                                                  | Median (IQR) | 14% (7%, 26%)                    | 15% (6%, 27%)                         | 14% (7%, 25%)                    | 13% (6%, 24%)                         |
| <i>Reference Meter Glucose</i>                   |              |                                  |                                       |                                  |                                       |
| ≤70 mg/dL                                        | N            | 81                               | 54                                    | 117                              | 45                                    |
|                                                  | Mean ± SD    | 22% ± 28%                        | 24% ± 20%                             | 23% ± 37%                        | 40% ± 73%                             |
|                                                  | Median (IQR) | 15% (8%, 28%)                    | 20% (12%, 31%)                        | 16% (8%, 28%)                    | 18% (11%, 33%)                        |
| 71-120 mg/dL                                     | N            | 578                              | 467                                   | 578                              | 489                                   |
|                                                  | Mean ± SD    | 20% ± 16%                        | 21% ± 19%                             | 19% ± 16%                        | 17% ± 15%                             |
|                                                  | Median (IQR) | 16% (7%, 30%)                    | 16% (7%, 29%)                         | 15% (6%, 27%)                    | 12% (6%, 25%)                         |
| 121-180 mg/dL                                    | N            | 756                              | 768                                   | 653                              | 722                                   |
|                                                  | Mean ± SD    | 17% ± 15%                        | 18% ± 15%                             | 18% ± 16%                        | 17% ± 16%                             |
|                                                  | Median (IQR) | 13% (6%, 23%)                    | 13% (6%, 25%)                         | 14% (7%, 25%)                    | 13% (6%, 25%)                         |
| >180 mg/dL                                       | N            | 778                              | 854                                   | 825                              | 873                                   |
|                                                  | Mean ± SD    | 18% ± 16%                        | 19% ± 17%                             | 17% ± 14%                        | 17% ± 15%                             |
|                                                  | Median (IQR) | 13% (6%, 25%)                    | 15% (6%, 27%)                         | 14% (7%, 23%)                    | 14% (7%, 24%)                         |

<sup>†</sup>Defined as the absolute value of the difference divided by the reference value, expressed as a percentage

SUPPLEMENTARY DATA

**Supplementary Table 9. Sensor Accuracy when Sensor Glucose below 70 mg/dL and a Paired Meter Blood Glucose was Available.**

| <i>Reference Meter Glucose</i> | <b>Age Group</b>             |                            |                                |                                     |                            |                                |                                     |
|--------------------------------|------------------------------|----------------------------|--------------------------------|-------------------------------------|----------------------------|--------------------------------|-------------------------------------|
|                                | <i>Total</i><br><i>N=772</i> | <b>11-14 Years of Age</b>  |                                |                                     | <b>4-10 Years of Age</b>   |                                |                                     |
|                                |                              | <i>All</i><br><i>N=417</i> | <i>Control</i><br><i>N=260</i> | <i>Intervention</i><br><i>N=157</i> | <i>All</i><br><i>N=355</i> | <i>Control</i><br><i>N=231</i> | <i>Intervention</i><br><i>N=124</i> |
| <70 mg/dL                      | 194 (25%)                    | 93 (22%)                   | 55 (21%)                       | 38 (24%)                            | 101 (28%)                  | 77 (33%)                       | 24 (19%)                            |
| 70-79 mg/dL                    | 111 (14%)                    | 63 (15%)                   | 45 (17%)                       | 18 (11%)                            | 48 (14%)                   | 36 (16%)                       | 12 (10%)                            |
| 80-89 mg/dL                    | 105 (14%)                    | 59 (14%)                   | 45 (17%)                       | 14 (9%)                             | 46 (13%)                   | 27 (12%)                       | 19 (15%)                            |
| ≥90 mg/dL                      | 362 (47%)                    | 202 (48%)                  | 115 (44%)                      | 87 (55%)                            | 160 (45%)                  | 91 (39%)                       | 69 (56%)                            |

**Supplementary Table 10. Among Intervention Nights with Pump Suspensions\*, Number of Pump Suspensions and their Duration by Time of Night - median (IQR)**

| <i>Age Group</i> | <i>Time of Night</i> <sup>†</sup> | <i># Events</i> | <i>Duration per Event (min)</i> | <i># Nights</i> <sup>‡</sup> | <i>Total Duration (min)</i> |
|------------------|-----------------------------------|-----------------|---------------------------------|------------------------------|-----------------------------|
| <b>11-14</b>     | Before Midnight                   | 686             | 13 (5, 29)                      | 370                          | 30 (11, 56)                 |
|                  | Midnight to 4:00AM                | 1211            | 11 (5, 25)                      | 439                          | 40 (19, 77)                 |
|                  | After 4:00AM                      | 826             | 10 (5, 19)                      | 364                          | 25 (10, 46)                 |
|                  | Before Midnight                   | 476             | 11 (5, 23)                      | 250                          | 21 (10, 45)                 |
| <b>4-10</b>      | Midnight to 4:00AM                | 752             | 14 (5, 26)                      | 274                          | 45 (20, 80)                 |
|                  | After 4:00AM                      | 676             | 10 (5, 20)                      | 297                          | 27 (14, 54)                 |

\* N=671 and 503 intervention nights with one or more pump suspensions among the 11-14 and 4-10 years of age respectively.

† Based on the when the suspension was initiated.

‡ Number of nights with at least one event starting during the indicated time period.
